# Supplementary material
Source: Royal Society of Chemistry journal article supplement (doi:10.1039/d6ta00952b)
Supplement: d6ta00952b1.pdf [file d6ta00952b1.pdf]

## Supporting Information

# Regulating Ordered Structure and MOR Catalytic Performance of $L1_0$ -FePt Nanoparticles through Mn Doping and Magnetic-Field Assistance

Ling Chang<sup>1,2</sup>, Qunshou Wang<sup>2</sup>, Dong Zhao<sup>2,3</sup>, Qinan Cheng<sup>2</sup>, Qiang Wang<sup>4</sup>, Wenli

Pei<sup>2</sup>, ✉

<sup>1</sup> School of Architecture and Civil Engineering, Shenyang University of Technology, Shenyang 110870, China

<sup>2</sup> Key Laboratory of Anisotropy and Texture of Materials (Ministry of Education), School of Materials Science and Engineering, Northeastern University, Shenyang, 110819, China

<sup>3</sup> School of Materials Science and Engineering, Shenyang Ligong University, 110159, China

<sup>4</sup> Key Laboratory of Electromagnetic Processing of Materials (Ministry of Education), Northeastern University, Shenyang 110819, China

\* Corresponding authors. E-mail addresses: peiwl@atm.neu.edu.cn

### First-principles calculations

DFT calculations were performed using VASP with PAW pseudopotentials and PBE functional [1-3]. We employed a 450 eV cutoff energy and ensured convergence within  $10^{-5}$  eV for energy and 0.01 eV/Å for ionic forces, using a  $5 \times 5 \times 1$   $\Gamma$ -centered k-mesh. The catalyst was modeled as a 6-layer  $L1_0$ -FePt (111) [4] supercell (96 atoms), with the bottom four layers constrained to bulk coordinates and a 15 Å vacuum layer applied. To accurately capture the Fe magnetic properties, spin-polarized ferromagnetic

configurations were enforced throughout the optimization process.

### References:

- [1] G. Kresse, J. Furthmüller, *Phys. Rev. B*, 1996, 54, 11169-11186.
- [2] P. E. Blöchl, *Phys. Rev. B*, 1994, 50, 17953-17979.
- [3] J. P. Perdew, A. Ruzsinszky, G. I. Csonka, O. A. Vydrov, G. E. Scuseria, L. A. Constantin, X. L. Zhou, K. Burke, *Phys. Rev. Lett.*, 2008, 100, 136406.
- [4] H. Hong, D. X. Liu, J. Li., *Rare Met.*, 2024, 43, 1108-1115.

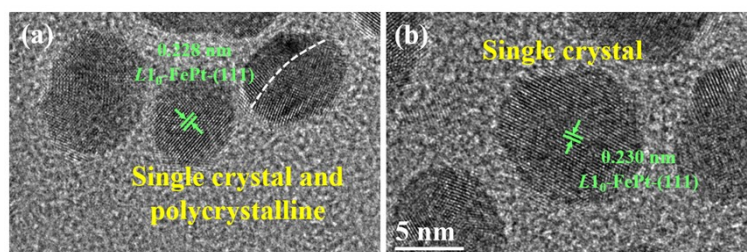

Fig. S1 HRTEM image of a single crystalline FePtMn-0 T (a) and FePtMn-2 T (b) samples

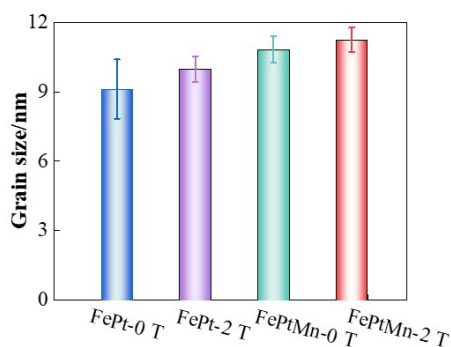

Fig. S2 Grain size of FePt and FePtMn NPs synthesized under 0 T and 2 T magnetic fields

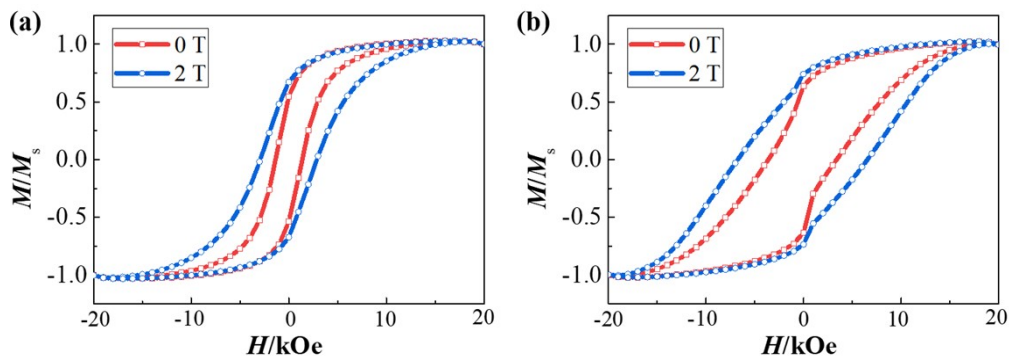

Fig. S3 Room temperature hysteresis loops of FePt NPs (a) and FePtMn NPs (a) synthesized under 0 T and 2 T magnetic fields

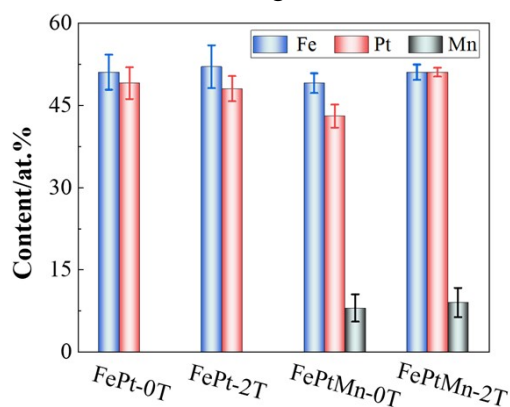

Fig. S4 The elemental composition of FePt and FePtMn NPs synthesized under 0 T and 2 T magnetic fields

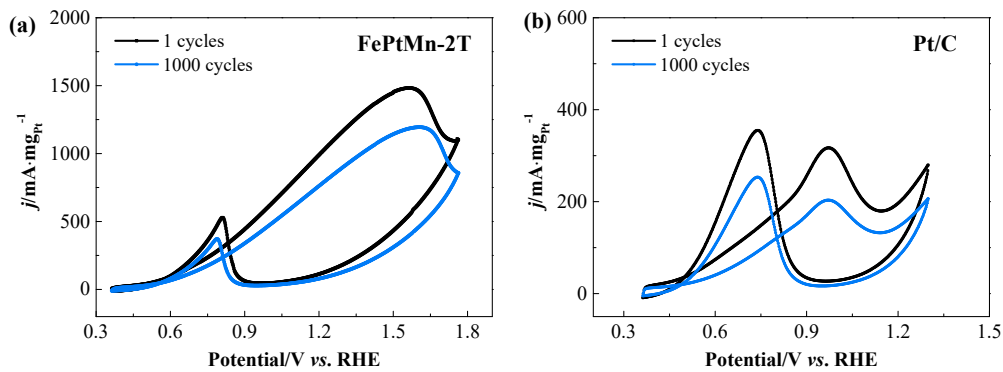

Fig. S5 The electrocatalytic durability of (a) FePtMn-2 T sample and (b) commercial Pt/C catalysts for MOR in 0.1 M HClO<sub>4</sub> solution containing 0.1 M methanol for 1000 CV cycles

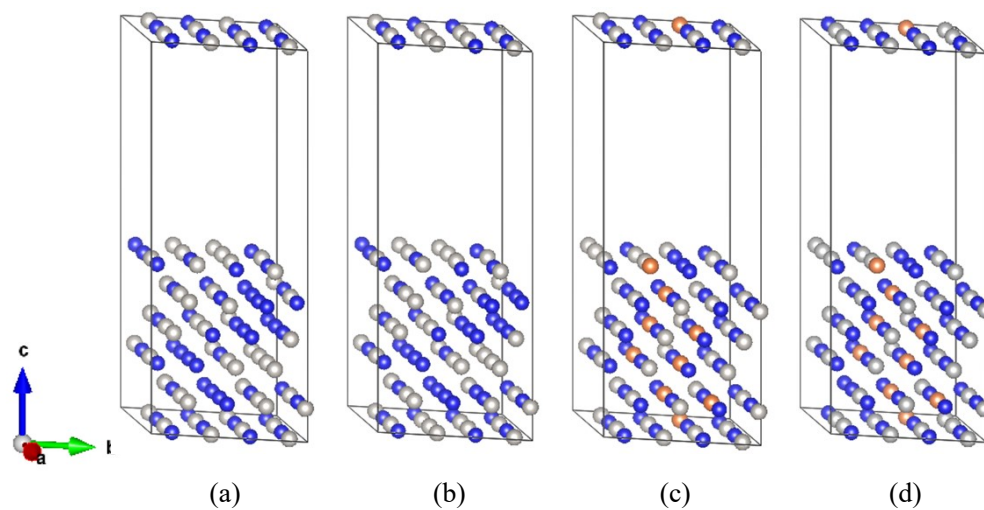

Fig. S6 DFT calculation models of (a) FePt-0T, (b) FePt-2T, (c) FePtMn-0T, and (d) FePtMn-2T samples
